# Supplementary material
Source: PubMed Central journal article supplement (PMC3993599)
Supplement: MCB.01526-13_zmb999100397so3.pdf [file MCB.01526-13_zmb999100397so3.pdf]

### **Movie M1: Colony growth of VEC-WT primary MLECs**

Time lapse video of primary murine lymphatic endothelial cells (MLECs) isolated from  $Cdh5^{wt/wt}$  mice. MLECs were grown at  $1 \times 10^4$  cells/well on gelatin-coated wells in an incubated chamber with  $CO_2$ . Images were taken every 30 minutes on an Axio Observer (Carl Zeiss inc.) with a CCD camera (Orca C4742-80-12G, Hamamatsu) and analyzed with Volocity software (Improvision). The video plays 5 frames per second.

### **Movie M2: Colony growth of VEC $\alpha$ C primary MLECs**

Time lapse video of primary murine lymphatic endothelial cells (MLECs) isolated from  $Cdh5^{VEC\alpha C/VEC\alpha C}$  mice. MLECs were grown at  $1 \times 10^4$  cells/well on gelatin-coated wells in an incubated chamber with  $CO_2$ . Images were taken every 30 minutes on an Axio Observer (Carl Zeiss inc.) with a CCD camera (Orca C4742-80-12G, Hamamatsu) and analyzed with Volocity software (Improvision). The video plays 5 frames per second.
